# Supplementary material for: Ophiobolin A kills human glioblastoma cells by inducing endoplasmic reticulum stress via disruption of thiol proteostasis
Source: PubMed Central journal article supplement (PMC5739770; doi:10.18632/oncotarget.22537), 2017-11-20
Supplement: oncotarget-08-106740-s001.pdf [file oncotarget-08-106740-s001.pdf]

# Ophiobolin A kills human glioblastoma cells by inducing endoplasmic reticulum stress via disruption of thiol proteostasis

## SUPPLEMENTARY MATERIALS

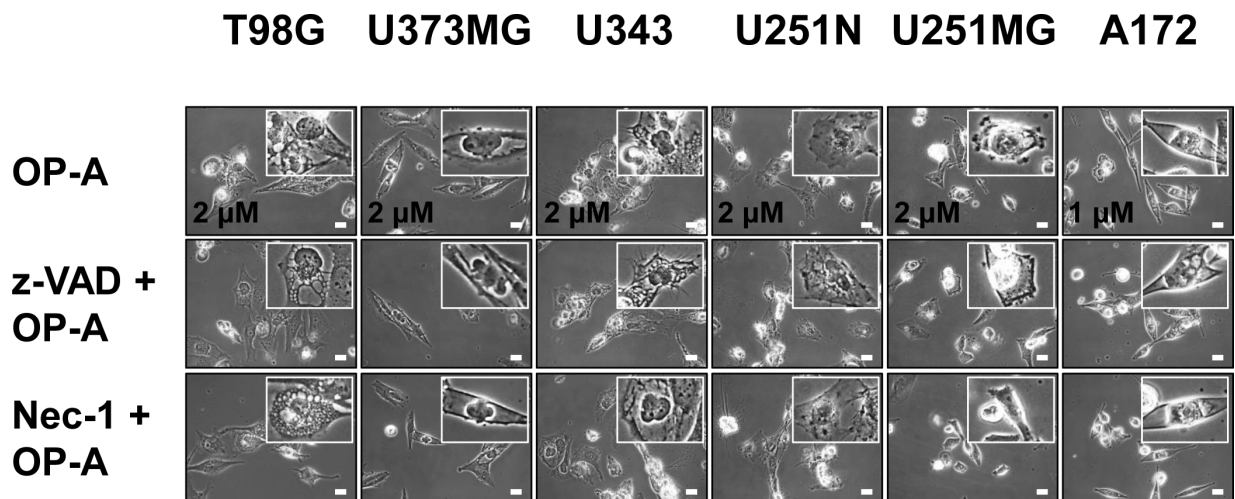

**Supplementary Figure 1: OP-A-induced vacuolation is not affected by pretreatment with z-VAD-fmk or necrostatin-1.** Cells were pretreated with 20 μM z-VAD or 80 μM necrostatin-1 for 30 min and further treated with 2 μM OP-A (1 μM OP-A in A172 cells) for 24 h and observed under the phase-contrast microscope. Bar, 20 μm.

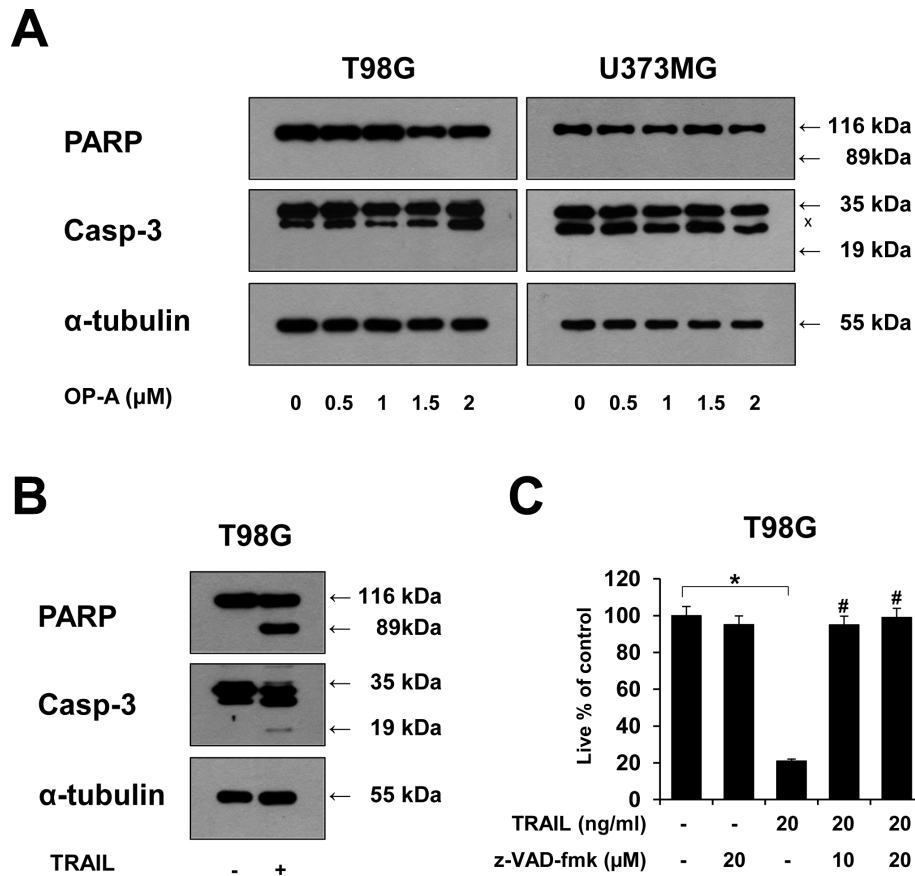

**Supplementary Figure 2: Caspase-mediated apoptosis is not involved in OP-A-induced cell death of glioma cells.** (A) Cells were treated with the indicated concentrations of OP-A for 24 h. Cell extracts were prepared from the treated cells and Western blotting of PARP and caspase-3 was performed.  $\alpha$ -tubulin was used as a loading control in Western blots. (B) Cell extracts were prepared from T98G cells untreated or treated with 20 mg/ml TRAIL (the nontagged 19 kDa protein, amino acids 114-281, KOMA Biotech (Seoul, South Korea)) for 24 h and Western blotting of PARP and caspase-3 was performed. (C) T98G cells pretreated with 20  $\mu$ M z-VAD-fmk were further treated with 2  $\mu$ M OP-A for 24 h. Cellular viability was assessed using calcein-AM and EthD-1. Data represent the means  $\pm$  SD ( $n = 7$ ). One-way ANOVA and Bonferroni's *post hoc* test. \* $P < 0.001$  vs. untreated control, # $P < 0.05$  vs. OP-A treatment.

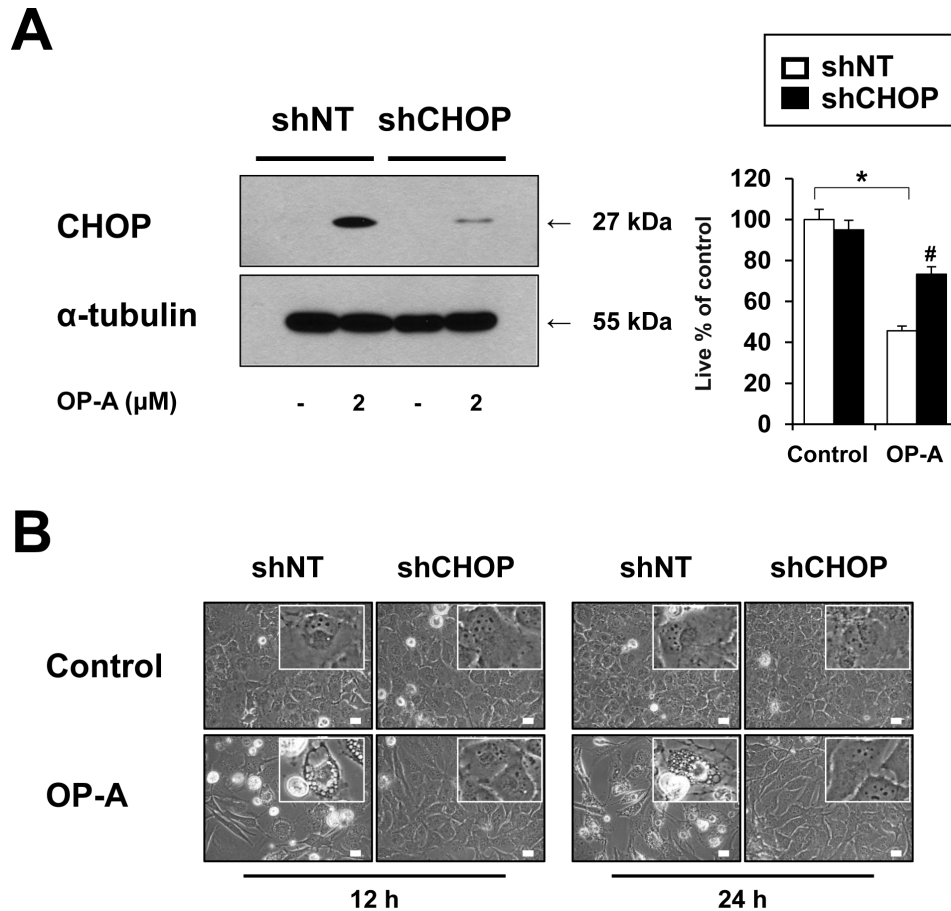

**Supplementary Figure 3: shRNA-mediated knockdown of CHOP attenuates OP-A-induced paraptosis-like cell death.**

For the knockdown experiments using CHOP-targeting shRNA, HEK293TN cells were transfected with the plasmid containing the non-targeting shRNA (SHC002V, Sigma-Aldrich) or the plasmid containing CHOP-targeting shRNA (TRCN0000364328, Sigma-Aldrich), together with pMD2.G (the envelope plasmid) and pPsAX2.0 plasmid (the packaging plasmid) using TransIT-2020 transfection reagents (Mirus Bio LLC, Madison, WI, USA) according to the manufacturer's instructions. After 48 h of lentiviral particle production, medium was harvested and filtered. T98G cells were infected with the filtered lentiviral medium encoding non-targeting (NT) shCHOP or CHOP shRNA, which was supplemented with 10 μg/ml polybrene. (A) Infected cells were further treated with 2 μM OP-A for 24 h. Western blotting of CHOP and α-tubulin was performed to confirm CHOP knockdown (*left*). Cellular viability was assessed using calcein-AM and EthD-1 (*right*). Data represent the means ± SD ( $n = 7$ ). One-way ANOVA and Bonferroni's *post hoc* test. \* $P < 0.001$  vs. untreated control, # $P < 0.05$  vs. OP-A treatment. (B) Infected cells were further treated with 2 μM OP-A for the indicated time points and observed under the phase-contrast microscope. Bar, 20 μm.

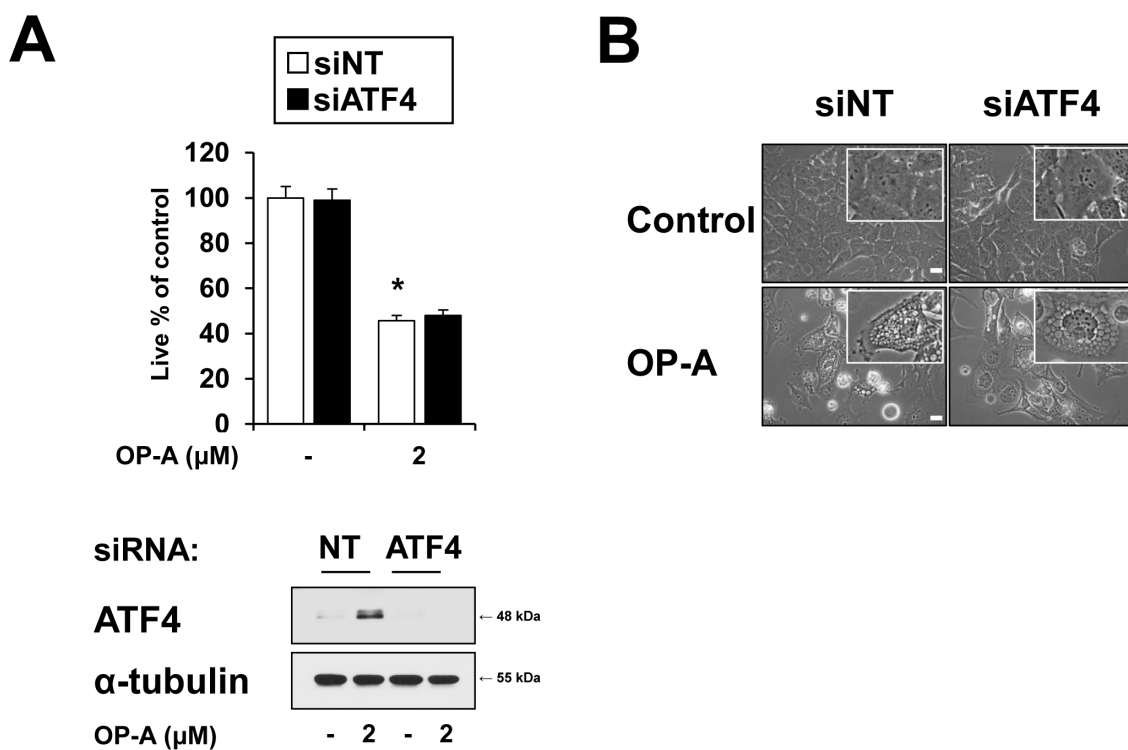

**Supplementary Figure 4: ATF4 upregulation may not be critically involved in OP-A-induced paraptosis-like cell death.** (A) The siRNA duplexes of ATF4 were purchased from Santa Cruz (sc-35112) and as the control, Negative Universal Control (Invitrogen) was used. T98G cells transfected with the non-targeting siRNA (siNT) or ATF4 siRNA were further treated with 2 μM OP-A for 24 h. Cellular viability was assessed using calcein-AM and EthD-1 (upper panel). Data represent the means ± SD ( $n = 7$ ). One-way ANOVA and Bonferroni's *post hoc* test. \* $P < 0.001$  vs. untreated control. ATF4 knockdown was confirmed by western blotting (lower panel). (B) Treated cells were observed under the phase-contrast microscope. Bar, 20 μm.

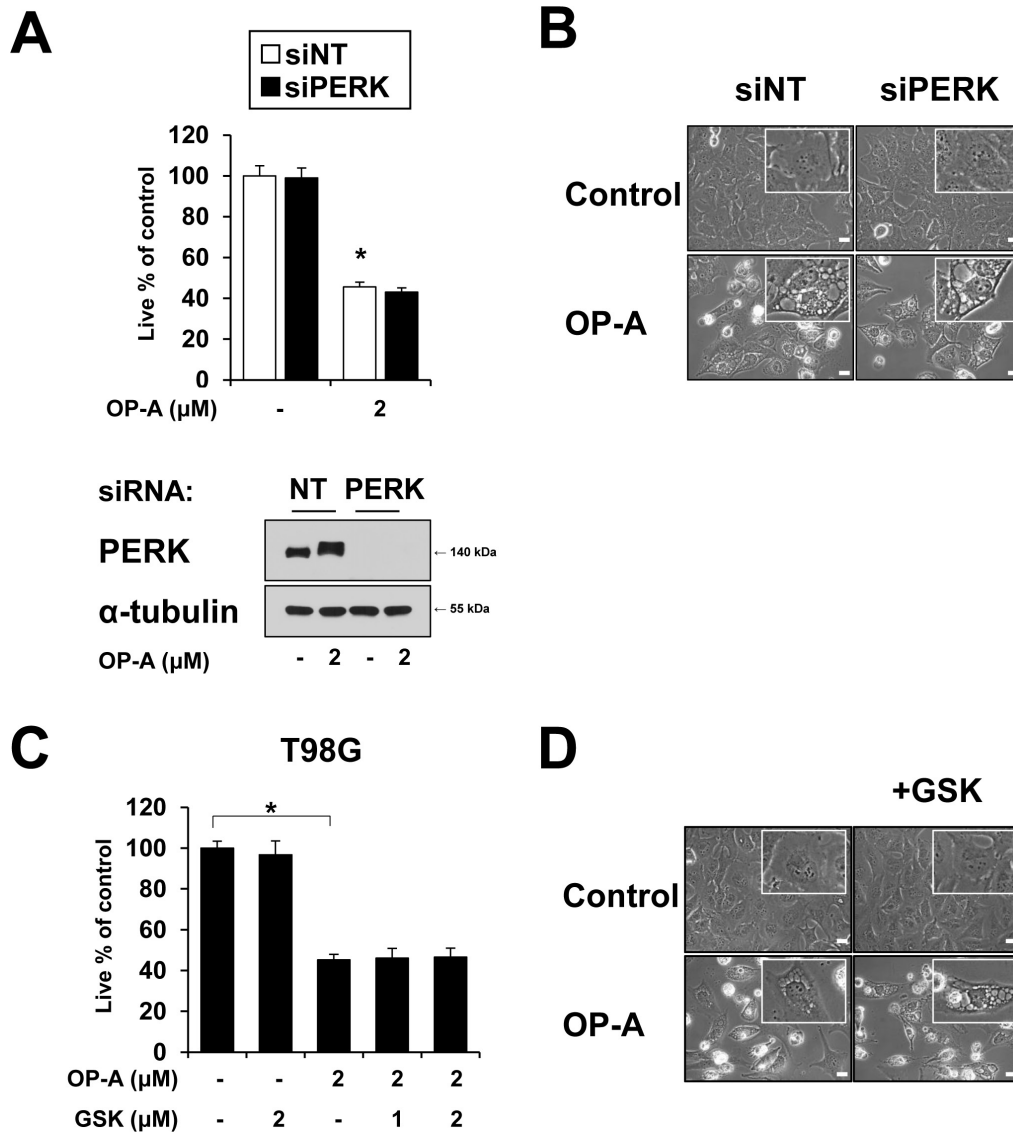

**Supplementary Figure 5: PERK may not be critically involved in OP-A-induced paraptosis-like cell death.**

(A) The siRNA duplexes of PERK were purchased from Santa Cruz (sc-36213) and as the control, Negative Universal Control (Invitrogen) was used. T98G cells transfected with the non-targeting siRNA (siNT) or PERK siRNA were further treated with 2 μM OP-A for 24 h. Cellular viability was assessed using calcein-AM and EthD-1 (*upper panel*). Data represent the means ± SD ( $n = 7$ ). One-way ANOVA and Bonferroni's *post hoc* test. \* $P < 0.001$  vs. untreated control, PERK knockdown was confirmed by western blotting (*lower panel*). (B) Treated cells were observed under the phase-contrast microscope. Bar, 20 μm. (C) T98G cells were pretreated with or without GSK2656157 and further treated with 2 μM OP-A for 24 h. Cellular viability was assessed using calcein-AM and EthD-1. Data represent the means ± SD ( $n = 7$ ). One-way ANOVA and Bonferroni's *post hoc* test. \* $P < 0.001$  vs. untreated control. (D) Treated cells were observed under the phase-contrast microscope. Bar, 20 μm.

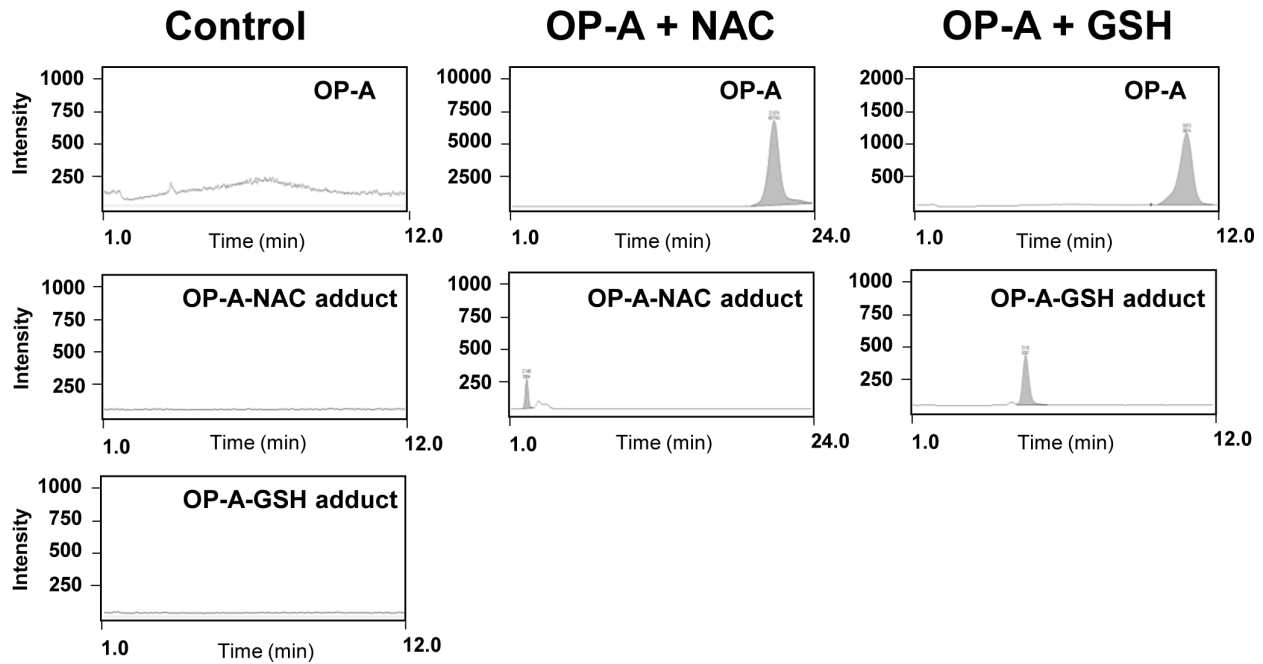

**Supplementary Figure 6: Confirmation of OP-A-NAC and OP-A-GSH adduct by the LC-MS/MS analysis with a MRM mode.** Equal volume of 100  $\mu\text{M}$  OP-A and 50 mM NAC or 50 mM GSH in methanol were mixed and analyzed by LC-MS/MS after 3 h incubation at 40°C. The analytes were eluted with a mobile phase consisting of 0.1% formic acid in water: 0.1% formic acid in methanol at a ratio of 35:65 (v/v) and a flow rate of 0.25 mL/min for OP-A-NAC adducts, or a ratio of 27:73 (v/v) and a flow rate of 0.2 mL/min for OP-A-GSH adducts. Peak identification was carried out using multiple reaction monitoring (MRM) in the positive ionization mode at  $m/z$  401 à 347 for OP-A,  $m/z$  564 à 401 for OP-A-NAC adducts and  $m/z$  708 à 308 for OP-A-GSH adducts. Representative chromatograms of control, OP-A-NAC adduct formation, and OP-A-GSH adduct formation are shown.

## + DTT

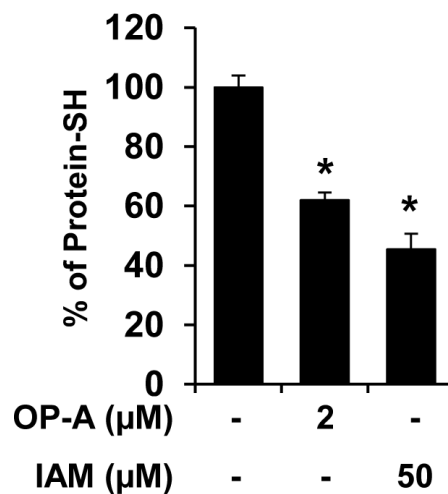

**Supplementary Figure 7: DTT incubation does not restore intracellular protein-SH levels depleted by OP-A.** T98G cells were treated with 2  $\mu\text{M}$  OP-A or 50  $\mu\text{M}$  IAM for 12 h, harvested, sonicated and incubated with 10 mM DTT for 30 min at room temperature. The excess of DTT was removed by dialysis, and protein-SH groups were analyzed as described in the Materials and Methods. Data represent the means  $\pm$  SD. Kruskal-Wallis test was performed followed by Dunn's test. \* $P < 0.001$  vs. untreated control.

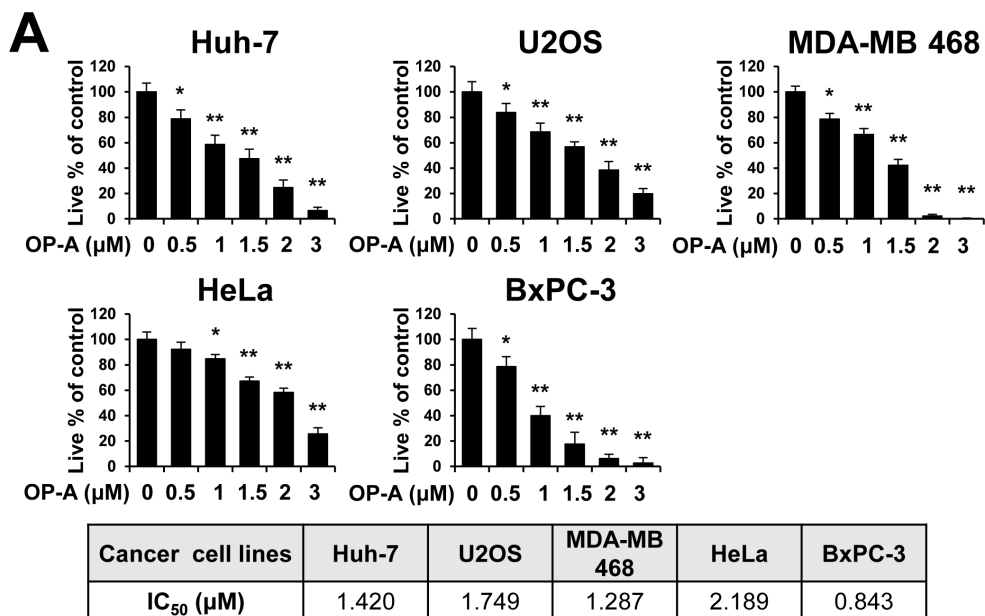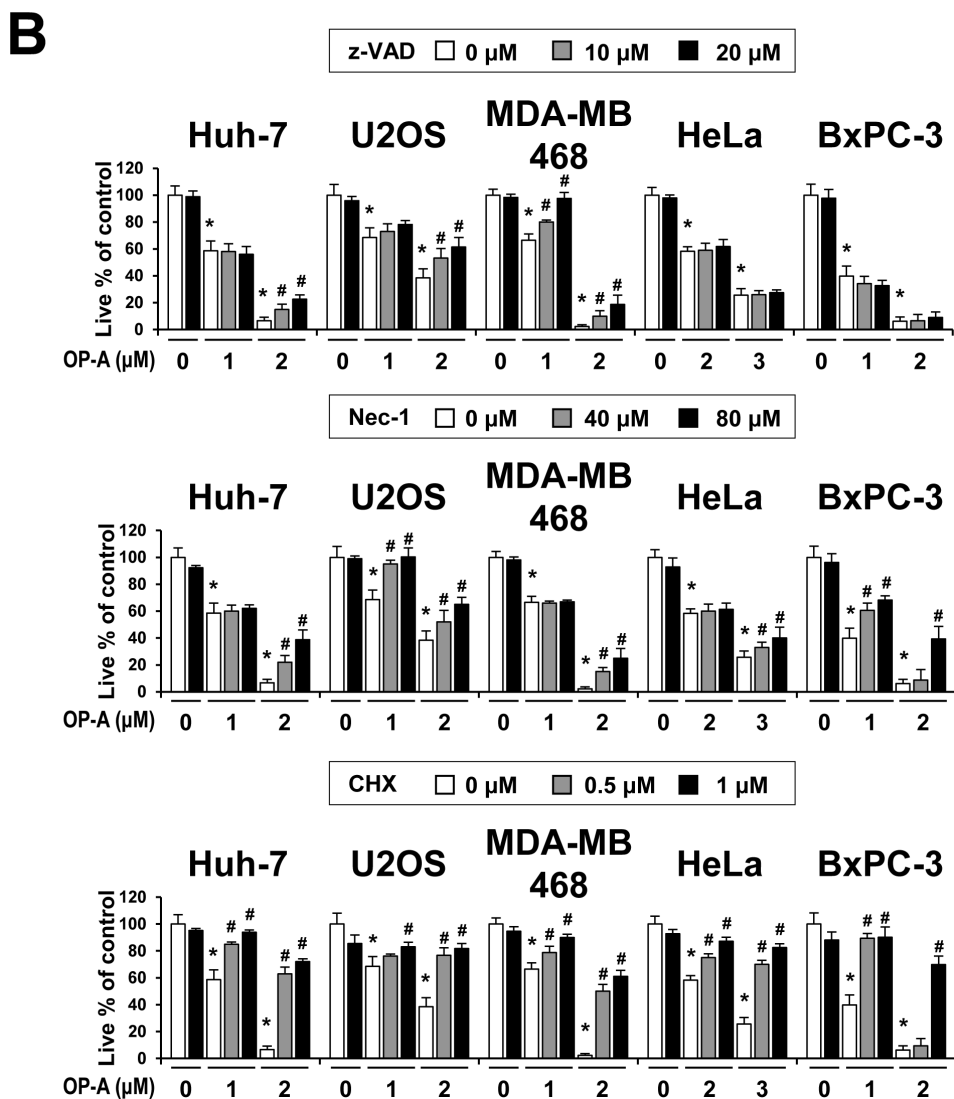

C

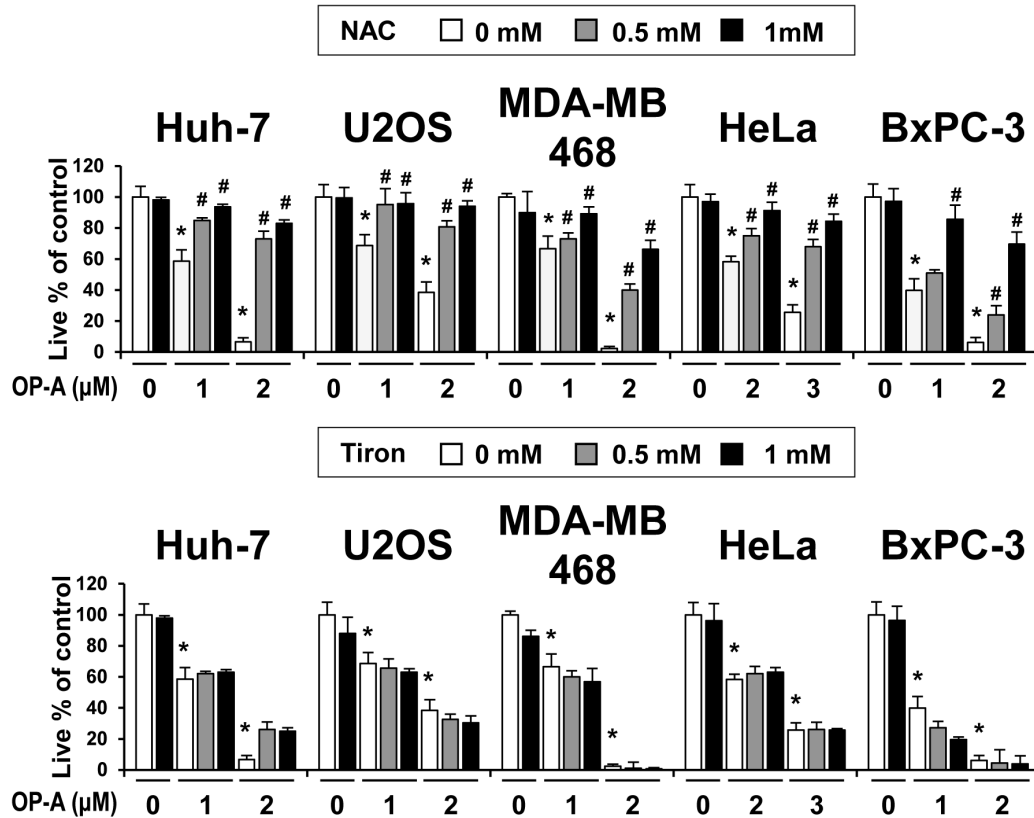

**Supplementary Figure 8: OP-A-induced disruption of thiol homeostasis is critical for OP-A-induced cytotoxicity regardless of final cell death mode(s).** (A) Cells were treated with the indicated concentrations of OP-A for 24 h. Cellular viability was assessed using calcein-AM and EthD-1. Data represent the means  $\pm$  SD ( $n = 7$ ). One-way ANOVA and Bonferroni's *post hoc* test. \* $P < 0.01$ , \*\* $P < 0.001$  vs. untreated control.  $IC_{50}$ s were calculated using GraphPad Prism. (B, C) Cells were pretreated with z-VAD-fmk, necrostatin-1, CHX (B), NAC, or Tiron (C) for 30 min and further treated with OP-A at the indicated concentrations for 24 h. Cell viability was assessed using calcein-AM and EthD-1. Data represent the means  $\pm$  SD ( $n = 7$ ). One-way ANOVA and Bonferroni's *post hoc* test. \* $P < 0.001$  vs. untreated control, # $P < 0.05$  vs. OP-A treatment.



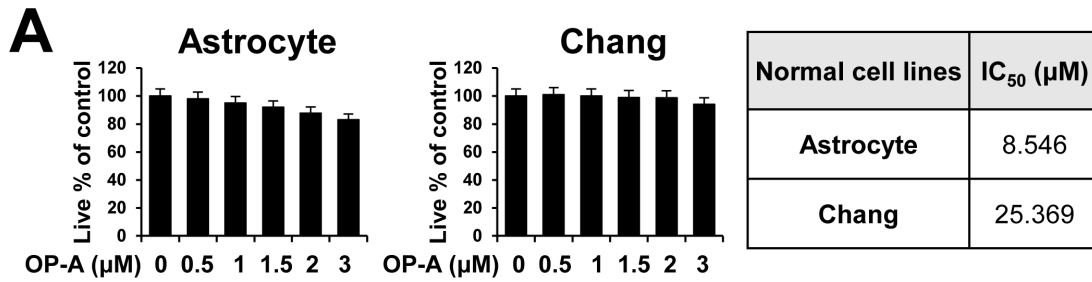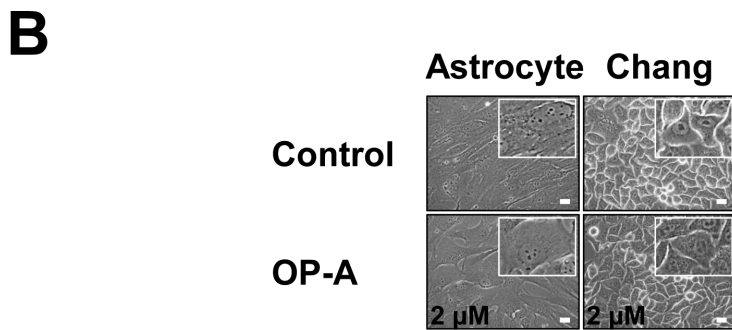

**Supplementary Figure 9: Effect of OP-A on the viabilities of astrocytes and Chang liver cells.** Astrocytes were obtained from Thermo Fisher Scientific (Waltham, MA, USA) and Chang normal liver cells were purchased from Sigma Aldrich. **(A)** After culturing of the cells in DMEM supplemented with 10% FBS, cells were treated with the indicated concentrations of OP-A for 24 h. Cellular viability was assessed using calcein-AM and EthD-1. Data represent the means  $\pm$  SD ( $n = 7$ ). Bonferroni's tests following One-way ANOVA did not reveal any significant post-hoc effects. IC<sub>50</sub>s were calculated using GraphPad Prism. **(B)** Cells were observed under the phase-contrast microscope. Bar 20  $\mu$ m.
